# Supplementary material for: The clinical effects of Orff music therapy on children with autism spectrum disorder: a comprehensive evaluation
Source: Front Neurol. 2024 Jun 6;15:1387060. doi: 10.3389/fneur.2024.1387060 (PMC11188925; doi:10.3389/fneur.2024.1387060)
Supplement: Supplementary file 3 [file Data_Sheet_1.XLSX]

## Sheet: Sheet1
ID	Group(0=Control)	Sensory_0	Relating_0	Body and object use_0	Language_0	Social and Self help_0	Total score_0	Sensory_3m	Relating_3m	Body and object use_3m	Language_3m	Social and Self help_3m	Total score_3m	Sensory_6m	Relating_6m	Body and object use_6m	Language_6m	Social and Self help_6m	Total score_6m	Sensory_0_3m	Relating_0_3m	Body and object use_0_3m	Language_0_3m	Social and Self help_0_3m	Total score_0_3m	Sensory_0_6m	Relating_0_6m	Body and object use_0_6m	Language_0_6m	Social and Self help_0_6m	Total score_0_6m	Sensory_3_6m	Relating_3_6m	Body and object use_3_6m	Language_3_6m	Social and Self help_3_6m	Total score_3_6m
1	Control group	24	31	21	28	19	123	19	27	16	23	15	100	17	21	14	20	11	83	5	4	5	5	4	23	7	10	7	8	8	40	2	6	2	3	4	17
2	Control group	21	30	15	26	15	107	17	23	13	21	14	88	17	23	11	21	12	84	4	7	2	5	1	19	4	7	4	5	3	23	0	0	2	0	2	4
3	Control group	22	29	18	27	17	113	22	29	18	27	17	113	18	28	16	22	14	98	0	0	0	0	0	0	4	1	2	5	3	15	4	1	2	5	3	15
4	Control group	25	32	21	28	21	127	15	22	15	19	18	89	15	22	14	19	14	84	10	10	6	9	3	38	10	10	7	9	7	43	0	0	1	0	4	5
5	Control group	24	31	21	28	20	124	21	27	17	25	18	108	18	25	15	23	14	95	3	4	4	3	2	16	6	6	6	5	6	29	3	2	2	2	4	13
6	Control group	18	29	11	23	12	93	18	23	11	22	12	86	17	22	11	21	12	83	0	6	0	1	0	7	1	7	0	2	0	10	1	1	0	1	0	3
7	Control group	22	28	18	27	17	112	22	28	18	26	17	111	18	20	17	21	14	90	0	0	0	1	0	1	4	8	1	6	3	22	4	8	1	5	3	21
8	Control group	20	25	13	25	13	96	19	25	13	23	13	93	19	24	13	23	13	92	1	0	0	2	0	3	1	1	0	2	0	4	0	1	0	0	0	1
9	Control group	20	25	14	25	14	98	17	23	11	21	13	85	15	23	11	18	12	79	3	2	3	4	1	13	5	2	3	7	2	19	2	0	0	3	1	6
10	Control group	21	27	15	26	15	104	21	27	15	25	15	103	19	27	15	23	14	98	0	0	0	1	0	1	2	0	0	3	1	6	2	0	0	2	1	5
11	Control group	21	26	14	25	14	100	21	26	14	25	14	100	14	19	13	17	10	73	0	0	0	0	0	0	7	7	1	8	4	27	7	7	1	8	4	27
12	Control group	23	30	19	28	18	118	21	28	18	26	16	109	15	27	17	17	12	88	2	2	1	2	2	9	8	3	2	11	6	30	6	1	1	9	4	21
13	Control group	21	28	17	27	16	109	21	28	17	26	16	108	15	28	15	17	14	89	0	0	0	1	0	1	6	0	2	10	2	20	6	0	2	9	2	19
14	Control group	21	26	14	25	14	100	18	26	14	23	13	94	18	26	14	23	13	94	3	0	0	2	1	6	3	0	0	2	1	6	0	0	0	0	0	0
15	Control group	21	27	16	26	15	105	19	27	16	23	15	100	15	23	13	18	13	82	2	0	0	3	0	5	6	4	3	8	2	23	4	4	3	5	2	18
16	Control group	21	27	15	26	15	104	18	26	14	23	13	94	18	21	14	22	13	88	3	1	1	3	2	10	3	6	1	4	2	16	0	5	0	1	0	6
17	Control group	23	30	20	28	19	120	19	27	18	25	16	105	17	23	17	20	11	88	4	3	2	3	3	15	6	7	3	8	8	32	2	4	1	5	5	17
18	Control group	20	25	13	24	13	95	18	25	13	22	13	91	16	25	12	19	11	83	2	0	0	2	0	4	4	0	1	5	2	12	2	0	1	3	2	8
19	Control group	21	26	15	26	15	103	15	22	12	19	13	81	15	22	11	19	10	77	6	4	3	7	2	22	6	4	4	7	5	26	0	0	1	0	3	4
20	Control group	18	24	11	23	12	88	18	24	11	23	12	88	18	24	11	23	12	88	0	0	0	0	0	0	0	0	0	0	0	0	0	0	0	0	0	0
21	Control group	14	19	8	19	9	69	14	19	8	19	9	69	14	19	8	19	9	69	0	0	0	0	0	0	0	0	0	0	0	0	0	0	0	0	0	0
22	Control group	21	28	16	26	16	107	15	22	13	19	14	83	15	19	9	19	10	72	6	6	3	7	2	24	6	9	7	7	6	35	0	3	4	0	4	11
23	Control group	22	28	17	27	17	111	22	28	17	27	17	111	16	28	13	19	15	91	0	0	0	0	0	0	6	0	4	8	2	20	6	0	4	8	2	20
24	Control group	19	24	11	23	13	90	18	24	11	22	13	88	18	19	11	22	13	83	1	0	0	1	0	2	1	5	0	1	0	7	0	5	0	0	0	5
25	Control group	25	32	22	28	21	128	21	28	18	26	16	109	17	28	15	21	12	93	4	4	4	2	5	19	8	4	7	7	9	35	4	0	3	5	4	16
26	Control group	17	22	9	21	10	79	17	22	9	21	10	79	15	22	9	17	8	71	0	0	0	0	0	0	2	0	0	4	2	8	2	0	0	4	2	8
27	Control group	21	26	14	25	14	100	21	26	14	25	14	100	20	26	13	24	11	94	0	0	0	0	0	0	1	0	1	1	3	6	1	0	1	1	3	6
28	Control group	20	25	13	24	13	95	20	25	13	24	13	95	17	22	13	21	12	85	0	0	0	0	0	0	3	3	0	3	1	10	3	3	0	3	1	10
29	Control group	23	30	20	28	19	120	17	23	16	21	15	92	17	21	14	20	12	84	6	7	4	7	4	28	6	9	6	8	7	36	0	2	2	1	3	8
30	Control group	23	30	19	28	18	118	22	30	19	26	17	114	20	25	17	24	15	101	1	0	0	2	1	4	3	5	2	4	3	17	2	5	2	2	2	13
31	Control group	21	26	14	25	14	100	18	26	14	23	13	94	18	26	14	23	13	94	3	0	0	2	1	6	3	0	0	2	1	6	0	0	0	0	0	0
32	Control group	21	27	15	26	15	104	18	25	13	22	13	91	15	24	11	18	9	77	3	2	2	4	2	13	6	3	4	8	6	27	3	1	2	4	4	14
33	Control group	18	24	11	23	12	88	18	24	11	23	12	88	18	24	11	22	10	85	0	0	0	0	0	0	0	0	0	1	2	3	0	0	0	1	2	3
34	Control group	16	20	8	20	9	73	16	20	8	20	9	73	16	20	8	20	9	73	0	0	0	0	0	0	0	0	0	0	0	0	0	0	0	0	0	0
35	Control group	20	25	13	24	13	95	20	25	13	24	13	95	16	22	12	19	10	79	0	0	0	0	0	0	4	3	1	5	3	16	4	3	1	5	3	16
36	Control group	21	26	14	25	14	100	17	25	12	21	12	87	17	25	11	21	12	86	4	1	2	4	2	13	4	1	3	4	2	14	0	0	1	0	0	1
37	Control group	22	29	19	28	18	116	22	29	19	28	18	116	17	28	17	20	11	93	0	0	0	0	0	0	5	1	2	8	7	23	5	1	2	8	7	23
38	Control group	22	29	18	28	18	115	22	29	18	27	17	113	22	25	16	27	12	102	0	0	0	1	1	2	0	4	2	1	6	13	0	4	2	0	5	11
39	Control group	20	25	12	24	13	94	15	22	10	21	11	79	15	22	10	21	10	78	5	3	2	3	2	15	5	3	2	3	3	16	0	0	0	0	1	1
40	Control group	20	25	13	24	13	95	20	25	13	24	13	95	19	25	11	23	13	91	0	0	0	0	0	0	1	0	2	1	0	4	1	0	2	1	0	4
41	Control group	18	23	11	22	12	86	18	23	11	22	12	86	16	18	10	19	10	73	0	0	0	0	0	0	2	5	1	3	2	13	2	5	1	3	2	13
42	Control group	17	22	10	21	10	80	17	22	10	21	10	80	16	22	10	19	9	76	0	0	0	0	0	0	1	0	0	2	1	4	1	0	0	2	1	4
43	Control group	16	21	8	21	10	76	16	21	8	21	10	76	16	20	8	19	10	73	0	0	0	0	0	0	0	1	0	2	0	3	0	1	0	2	0	3
44	Control group	24	32	21	28	20	125	17	25	16	22	17	97	16	25	14	21	9	85	7	7	5	6	3	28	8	7	7	7	11	40	1	0	2	1	8	12
45	Control group	19	25	12	24	13	93	19	25	12	24	13	93	16	25	12	19	10	82	0	0	0	0	0	0	3	0	0	5	3	11	3	0	0	5	3	11
46	Observation group	24	31	20	28	20	123	17	23	16	22	17	95	13	20	12	18	11	74	7	8	4	6	3	28	11	11	8	10	9	49	4	3	4	4	6	21
47	Observation group	21	27	15	26	16	105	14	20	12	18	14	78	14	20	12	18	12	76	7	7	3	8	2	27	7	7	3	8	4	29	0	0	0	0	2	2
48	Observation group	22	29	17	27	18	113	21	28	17	26	18	110	14	22	14	20	13	83	1	1	0	1	0	3	8	7	3	7	5	30	7	6	3	6	5	27
49	Observation group	25	32	22	28	22	129	13	19	15	17	18	82	13	15	9	12	14	63	12	13	7	11	4	47	12	17	13	16	8	66	0	4	6	5	4	19
50	Observation group	24	31	21	28	21	125	18	24	20	22	18	102	15	22	15	20	15	87	6	7	1	6	3	23	9	9	6	8	6	38	3	2	5	2	3	15
51	Observation group	18	24	19	23	11	95	15	22	9	19	11	76	14	21	9	14	11	69	3	2	10	4	0	19	4	3	10	9	0	26	1	1	0	5	0	7
52	Observation group	22	29	17	27	18	113	19	27	17	25	17	105	14	22	14	19	10	79	3	2	0	2	1	8	8	7	3	8	8	34	5	5	3	6	7	26
53	Observation group	20	26	13	25	14	98	17	23	13	21	14	88	15	20	13	15	11	74	3	3	0	4	0	10	5	6	0	10	3	24	2	3	0	6	3	14
54	Observation group	20	27	13	25	14	99	14	20	12	19	12	77	14	19	10	16	10	69	6	7	1	6	2	22	6	8	3	9	4	30	0	1	2	3	2	8
55	Observation group	21	27	15	26	16	105	18	24	15	23	16	96	15	23	15	14	11	78	3	3	0	3	0	9	6	4	0	12	5	27	3	1	0	9	5	18
56	Observation group	21	27	14	26	15	103	19	27	14	25	15	100	18	26	9	16	11	80	2	0	0	1	0	3	3	1	5	10	4	23	1	1	5	9	4	20
57	Observation group	23	30	19	28	19	119	18	26	17	23	17	101	11	18	9	16	14	68	5	4	2	5	2	18	12	12	10	12	5	51	7	8	8	7	3	33
58	Observation group	22	28	16	27	17	110	19	26	16	25	17	103	11	18	10	12	10	61	3	2	0	2	0	7	11	10	6	15	7	49	8	8	6	13	7	42
59	Observation group	21	27	14	25	15	102	15	23	14	21	15	88	12	18	14	15	12	71	6	4	0	4	0	14	9	9	0	10	3	31	3	5	0	6	3	17
60	Observation group	21	27	15	26	16	105	17	23	15	22	15	92	11	19	10	16	9	65	4	4	0	4	1	13	10	8	5	10	7	40	6	4	5	6	6	27
61	Observation group	21	27	15	26	15	104	15	22	14	21	14	86	11	22	14	20	10	77	6	5	1	5	1	18	10	5	1	6	5	27	4	0	0	1	4	9
62	Observation group	23	30	19	28	19	119	17	23	16	22	17	95	13	20	12	16	9	70	6	7	3	6	2	24	10	10	7	12	10	49	4	3	4	6	8	25
63	Observation group	20	26	12	25	13	96	15	22	12	21	13	83	12	20	11	17	10	70	5	4	0	4	0	13	8	6	1	8	3	26	3	2	1	4	3	13
64	Observation group	21	27	15	26	15	104	11	17	13	17	14	72	11	17	9	17	12	66	10	10	2	9	1	32	10	10	6	9	3	38	0	0	4	0	2	6
65	Observation group	19	25	10	23	11	88	19	25	10	23	11	88	17	25	10	23	11	86	0	0	0	0	0	0	2	0	0	0	0	2	2	0	0	0	0	2
66	Observation group	14	20	7	20	10	71	14	20	7	20	9	70	14	20	7	20	9	70	0	0	0	0	1	1	0	0	0	0	1	1	0	0	0	0	0	0
67	Observation group	21	28	16	27	16	108	13	19	12	17	14	75	13	19	9	17	11	69	8	9	4	10	2	33	8	9	7	10	5	39	0	0	3	0	3	6
68	Observation group	22	28	17	27	17	111	19	27	17	25	17	105	12	19	11	17	13	72	3	1	0	2	0	6	10	9	6	10	4	39	7	8	6	8	4	33
69	Observation group	19	25	10	24	12	90	15	22	10	19	12	78	15	22	10	15	12	74	4	3	0	5	0	12	4	3	0	9	0	16	0	0	0	4	0	4
70	Observation group	25	32	22	28	22	129	18	26	17	23	16	100	13	21	13	19	10	76	7	6	5	5	6	29	12	11	9	9	12	53	5	5	4	4	6	24
71	Observation group	17	23	7	22	10	79	17	23	7	22	10	79	16	19	7	18	9	69	0	0	0	0	0	0	1	4	0	4	1	10	1	4	0	4	1	10
72	Observation group	21	27	13	25	14	100	18	26	13	23	14	94	16	24	12	20	14	86	3	1	0	2	0	6	5	3	1	5	0	14	2	2	1	3	0	8
73	Observation group	20	26	13	25	14	98	20	26	13	25	14	98	14	21	13	19	11	78	0	0	0	0	0	0	6	5	0	6	3	20	6	5	0	6	3	20
74	Observation group	24	30	19	28	20	121	14	20	15	18	18	85	14	20	12	17	15	78	10	10	4	10	2	36	10	10	7	11	5	43	0	0	3	1	3	7
75	Observation group	23	30	19	28	19	119	19	27	19	25	17	107	16	24	16	22	12	90	4	3	0	3	2	12	7	6	3	6	7	29	3	3	3	3	5	17
76	Observation group	21	27	14	26	15	103	15	22	14	21	14	86	15	22	14	20	11	82	6	5	0	5	1	17	6	5	0	6	4	21	0	0	0	1	3	4
77	Observation group	21	27	15	26	16	105	15	22	13	19	14	83	12	19	10	16	9	66	6	5	2	7	2	22	9	8	5	10	7	39	3	3	3	3	5	17
78	Observation group	18	24	10	23	11	86	17	23	10	21	11	82	15	22	10	20	11	78	1	1	0	2	0	4	3	2	0	3	0	8	2	1	0	1	0	4
79	Observation group	16	21	7	21	11	76	16	21	7	21	9	74	12	18	7	21	9	67	0	0	0	0	2	2	4	3	0	0	2	9	4	3	0	0	0	7
80	Observation group	20	26	12	24	13	95	18	26	12	23	13	92	12	20	11	17	10	70	2	0	0	1	0	3	8	6	1	7	3	25	6	6	1	6	3	22
81	Observation group	21	27	14	26	15	103	14	20	12	19	12	77	14	20	12	19	11	76	7	7	2	7	3	26	7	7	2	7	4	27	0	0	0	0	1	1
82	Observation group	23	29	18	28	19	117	22	28	18	26	19	113	13	20	12	18	13	76	1	1	0	2	0	4	10	9	6	10	6	41	9	8	6	8	6	37
83	Observation group	23	29	18	28	18	116	19	27	18	25	18	107	18	26	12	24	17	97	4	2	0	3	0	9	5	3	6	4	1	19	1	1	6	1	1	10
84	Observation group	20	26	12	24	13	95	13	19	10	18	11	71	13	19	10	16	11	69	7	7	2	6	2	24	7	7	2	8	2	26	0	0	0	2	0	2
85	Observation group	20	26	12	25	13	96	20	26	12	25	13	96	15	23	10	20	13	81	0	0	0	0	0	0	5	3	2	5	0	15	5	3	2	5	0	15
86	Observation group	18	24	9	23	11	85	18	24	9	23	11	85	12	20	9	17	10	68	0	0	0	0	0	0	6	4	0	6	1	17	6	4	0	6	1	17
87	Observation group	17	23	8	22	10	80	17	23	8	22	10	80	15	23	8	21	10	77	0	0	0	0	0	0	2	0	0	1	0	3	2	0	0	1	0	3
88	Observation group	16	22	7	21	13	79	16	22	7	21	9	75	13	20	7	18	9	67	0	0	0	0	4	4	3	2	0	3	4	12	3	2	0	3	0	8
89	Observation group	25	31	21	28	21	126	14	20	12	19	18	83	14	20	12	19	10	75	11	11	9	9	3	43	11	11	9	9	11	51	0	0	0	0	8	8
90	Observation group	19	25	11	24	12	91	19	25	11	24	12	91	13	20	11	18	10	72	0	0	0	0	0	0	6	5	0	6	2	19	6	5	0	6	2	19
91	Observation group	19	26	10	23	16	94	16	22	7	20	14	79	12	19	6	17	11	65	3	4	3	3	2	15	7	7	4	6	5	29	4	3	1	3	3	14
92	Observation group	21	30	19	25	17	112	18	24	16	23	13	94	11	21	12	21	10	75	3	6	3	2	4	18	10	9	7	4	7	37	7	3	4	2	3	19
93	Observation group	22	28	17	27	18	112	17	25	14	23	15	94	13	23	11	19	12	78	5	3	3	4	3	18	9	5	6	8	6	34	4	2	3	4	3	16
