# Supplementary material for: The clinical effects of Orff music therapy on children with autism spectrum disorder: a comprehensive evaluation
Source: Front Neurol. 2024 Jun 6;15:1387060. doi: 10.3389/fneur.2024.1387060 (PMC11188925; doi:10.3389/fneur.2024.1387060)
Supplement: Supplementary file 4 [file Data_Sheet_2.XLSX]

## Sheet: Sheet1
ID	Group	CARS_0m	CARS_3m	CARS_6m	CARS_df_0_3m	CARS_df_0_6m	CARS_df_3_6m
1	Control group	40	35	33	5	7	2
2	Control group	38	32	32	6	6	0
3	Control group	40	36	35	4	5	1
4	Control group	40	32	32	8	8	0
5	Control group	40	35	35	5	5	0
6	Control group	32	32	32	0	0	0
7	Control group	40	37	35	3	5	2
8	Control group	35	35	35	0	0	0
9	Control group	35	32	32	3	3	0
10	Control group	38	37	35	1	3	2
11	Control group	37	37	34	0	3	3
12	Control group	40	38	34	2	6	4
13	Control group	39	37	36	2	3	1
14	Control group	37	34	34	3	3	0
15	Control group	38	35	32	3	6	3
16	Control group	38	34	34	4	4	0
17	Control group	38	35	33	3	5	2
18	Control group	35	34	32	1	3	2
19	Control group	37	34	32	3	5	2
20	Control group	32	32	32	0	0	0
21	Control group	33	32	31	1	2	1
22	Control group	39	32	32	7	7	0
23	Control group	39	36	34	3	5	2
24	Control group	33	32	32	1	1	0
25	Control group	38	37	33	1	5	4
26	Control group	34	33	31	1	3	2
27	Control group	37	37	37	0	0	0
28	Control group	35	35	33	0	2	2
29	Control group	40	36	32	4	8	4
30	Control group	40	39	37	1	3	2
31	Control group	37	34	34	3	3	0
32	Control group	38	32	32	6	6	0
33	Control group	32	32	32	0	0	0
34	Control group	34	33	32	1	2	1
35	Control group	34	34	32	0	2	2
36	Control group	37	32	32	5	5	0
37	Control group	40	38	35	2	5	3
38	Control group	40	38	35	2	5	3
39	Control group	34	32	32	2	2	0
40	Control group	34	33	32	1	2	1
41	Control group	32	32	32	0	0	0
42	Control group	31	30	30	1	1	0
43	Control group	32	31	30	1	2	1
44	Control group	40	32	32	8	8	0
45	Control group	34	34	32	0	2	2
46	Observation group	40	34	32	6	8	2
47	Observation group	38	32	32	6	6	0
48	Observation group	40	35	33	5	7	2
49	Observation group	40	36	32	4	8	4
50	Observation group	40	35	32	5	8	3
51	Observation group	33	32	32	1	1	0
52	Observation group	40	36	32	4	8	4
53	Observation group	36	34	31	2	5	3
54	Observation group	36	34	32	2	4	2
55	Observation group	38	35	32	3	6	3
56	Observation group	38	35	32	3	6	3
57	Observation group	40	35	32	5	8	3
58	Observation group	39	35	32	4	7	3
59	Observation group	37	34	32	3	5	2
60	Observation group	38	34	32	4	6	2
61	Observation group	38	32	32	6	6	0
62	Observation group	40	34	32	6	8	2
63	Observation group	36	33	32	3	4	1
64	Observation group	38	34	32	4	6	2
65	Observation group	35	33	33	2	2	0
66	Observation group	35	34	32	1	3	2
67	Observation group	39	34	32	5	7	2
68	Observation group	39	39	32	0	7	7
69	Observation group	34	32	32	2	2	0
70	Observation group	40	35	32	5	8	3
71	Observation group	34	32	31	2	3	1
72	Observation group	37	35	32	2	5	3
73	Observation group	36	36	33	0	3	3
74	Observation group	40	32	32	8	8	0
75	Observation group	40	37	35	3	5	2
76	Observation group	37	32	32	5	5	0
77	Observation group	38	32	32	6	6	0
78	Observation group	35	32	31	3	4	1
79	Observation group	33	31	30	2	3	1
80	Observation group	36	35	32	1	4	3
81	Observation group	37	32	32	5	5	0
82	Observation group	37	35	32	2	5	3
83	Observation group	38	36	32	2	6	4
84	Observation group	36	32	32	4	4	0
85	Observation group	36	36	33	0	3	3
86	Observation group	35	33	32	1	3	1
87	Observation group	34	32	32	2	2	0
88	Observation group	33	31	30	2	3	1
89	Observation group	40	35	32	5	8	3
90	Observation group	38	34	32	4	6	2
91	Observation group	39	36	35	3	4	1
92	Observation group	42	40	39	2	3	1
93	Observation group	40	37	36	3	4	1
