# Supplementary material for: The clinical effects of Orff music therapy on children with autism spectrum disorder: a comprehensive evaluation
Source: Front Neurol. 2024 Jun 6;15:1387060. doi: 10.3389/fneur.2024.1387060 (PMC11188925; doi:10.3389/fneur.2024.1387060)
Supplement: Supplementary file 5 [file Data_Sheet_3.XLSX]

## Sheet: Sheet1
ID	Group	CVP_0m	EL_Om	RL_0m	FM_0m	GM_0m	VMI_0m	AE_0m	SR_0m	CMB_0m	CVB_0m		CVP_3m	EL_3m	RL_3m	FM_3m	GM_3m	VMI_3m	AE_3m	SR_3m	CMB_3m	CVB_3m		CVP_6m	EL_6m	RL_6m	FM_6m	GM_6m	VMI_6m	AE_6m	SR_6m	CMB_6m	CVB_6m		CVP_0_3m	EL_O_3m	RL_0_3m	FM_0_3m	GM_0_3m	VMI_0_3m	AE_0_3m	SR_0_3m	CMB_0_3m	CVB_0_3m	CVP_0_6m	EL_O_6m	RL_0_6m	FM_0_6m	GM_0_6m
1	Control group	32	31	14	33	28	13	15	8	15	11		32	31	26	30	30	13	16	12	16	15		45	44	33	37	30	17	18	16	17	15		0	0	12	3	2	0	1	4	1	4	13	13	19	7	2
2	Control group	17	16	15	19	24	8	14	6	12	11		17	16	17	19	26	10	14	9	12	11		33	33	24	31	27	13	17	12	13	11		0	0	2	0	2	2	0	3	0	0	16	17	9	12	3
3	Control group	8	10	8	32	24	12	16	10	9	12		38	39	25	33	27	15	17	13	15	12		38	39	29	33	28	15	17	13	15	12		30	29	17	1	3	3	1	3	6	0	30	29	21	1	4
4	Control group	11	11	14	15	19	6	12	6	9	4		24	14	22	15	20	15	12	6	9	4		48	27	35	38	20	17	18	17	18	15		13	3	8	0	1	9	0	0	0	0	37	16	21	23	1
5	Control group	26	34	28	31	25	12	17	6	15	14		38	38	28	37	26	13	18	14	17	15		46	40	34	37	27	17	18	16	17	15		12	4	0	6	1	1	1	8	2	1	20	6	6	6	2
6	Control group	21	16	13	24	22	8	14	8	10	7		21	20	14	24	22	9	14	8	10	7		21	21	16	24	23	9	14	10	10	7		0	4	1	0	0	1	0	0	0	0	0	5	3	0	1
7	Control group	23	35	20	31	25	11	16	12	15	12		38	38	26	33	26	15	17	13	15	12		38	38	28	33	27	15	17	13	15	12		15	3	6	2	1	4	1	1	0	0	15	3	8	2	2
8	Control group	28	18	15	27	26	11	16	10	13	8		28	28	20	28	26	11	16	10	13	9		28	28	22	28	26	11	16	10	13	9		0	10	5	1	0	0	0	0	0	1	0	10	7	1	0
9	Control group	17	19	10	21	19	10	12	9	12	7		17	19	19	21	20	10	14	9	12	9		28	28	22	28	21	11	16	10	13	9		0	0	9	0	1	0	2	0	0	2	11	9	12	7	2
10	Control group	32	33	25	30	26	12	17	12	13	11		33	33	25	31	28	13	17	12	13	11		33	33	25	31	28	13	17	12	13	11		1	0	0	1	2	1	0	0	0	0	1	0	0	1	2
11	Control group	23	30	19	29	15	11	11	11	13	10		31	30	24	29	24	12	16	11	13	10		31	30	24	29	25	12	16	11	13	10		8	0	5	0	9	1	5	0	0	0	8	0	5	0	10
12	Control group	35	25	20	23	23	13	12	14	14	10		42	41	31	30	25	14	17	15	15	14		42	44	32	35	26	16	17	15	16	14		7	16	11	7	2	1	5	1	1	4	7	19	12	12	3
13	Control group	11	14	25	30	17	12	12	8	14	11		36	37	27	32	23	14	17	13	14	12		36	37	27	32	24	14	17	13	14	12		25	23	2	2	6	2	5	5	0	1	25	23	2	2	7
14	Control group	30	28	23	27	26	8	16	11	13	10		30	28	23	29	26	11	16	11	13	10		31	30	23	29	27	12	16	11	13	10		0	0	0	2	0	3	0	0	0	0	1	2	0	2	1
15	Control group	22	33	24	28	18	10	12	12	13	7		34	33	25	31	19	13	16	12	13	11		34	33	25	31	20	13	17	12	13	11		12	0	1	3	1	3	4	0	0	4	12	0	1	3	2
16	Control group	30	17	22	26	23	10	16	10	13	10		30	28	24	30	24	11	16	11	13	10		33	32	24	30	27	13	16	11	13	10		0	11	2	4	1	1	0	1	0	0	3	15	2	4	4
17	Control group	32	29	24	30	26	13	15	10	16	10		37	33	27	31	27	14	16	12	16	14		42	44	32	35	28	16	17	15	16	14		5	4	3	1	1	1	1	2	0	4	10	15	8	5	2
18	Control group	25	24	21	22	24	11	13	8	7	9		26	25	21	26	25	11	14	10	13	9		27	28	21	27	26	11	15	10	13	9		1	1	0	4	1	0	1	2	6	0	2	4	0	5	2
19	Control group	9	9	12	14	16	6	12	6	9	4		24	9	12	14	16	6	12	6	9	4		32	32	24	30	18	13	16	11	13	10		15	0	0	0	0	0	0	0	0	0	23	23	12	16	2
20	Control group	22	19	5	20	23	9	14	8	11	8		22	21	17	24	23	10	14	9	11	8		22	21	17	24	23	10	14	10	11	8		0	2	12	4	0	1	0	1	0	0	0	2	12	4	0
21	Control group	7	6	5	15	17	5	11	6	6	3		7	6	5	15	17	5	11	6	6	3		8	6	10	16	19	5	11	8	6	3		0	0	0	0	0	0	0	0	0	0	1	0	5	1	2
22	Control group	11	11	14	15	23	6	12	6	9	4		11	11	14	15	24	6	12	6	9	4		35	36	26	32	28	14	17	12	14	11		0	0	0	0	1	0	0	0	0	0	24	25	12	17	5
23	Control group	24	38	20	30	24	9	13	12	14	10		37	38	28	33	26	14	17	13	14	12		37	38	28	33	27	14	17	13	14	12		13	0	8	3	2	5	4	1	0	2	13	0	8	3	3
24	Control group	23	22	17	24	22	10	14	9	10	8		23	22	17	24	22	10	14	9	11	8		23	22	17	24	24	10	14	10	11	8		0	0	0	0	0	0	0	0	1	0	0	0	0	0	2
25	Control group	40	34	29	15	28	6	15	8	14	11		43	41	31	30	29	15	18	15	18	15		49	44	35	38	30	17	18	17	18	15		3	7	2	15	1	9	3	7	4	4	9	10	6	23	2
26	Control group	17	15	4	22	20	8	12	7	9	6		17	15	13	22	21	8	13	7	9	6		17	15	13	22	21	8	13	8	9	6		0	0	9	0	1	0	1	0	0	0	0	0	9	0	1
27	Control group	30	15	17	28	25	9	14	11	13	9		30	29	23	28	26	12	16	11	13	9		30	29	25	29	26	12	16	11	13	9		0	14	6	0	1	3	2	0	0	0	0	14	8	1	1
28	Control group	16	24	17	26	24	11	15	10	10	9		28	28	21	27	25	11	15	10	13	9		28	28	21	27	26	11	15	10	13	9		12	4	4	1	1	0	0	0	3	0	12	4	4	1	2
29	Control group	17	6	14	19	27	8	14	9	12	10		17	16	17	19	28	12	14	9	12	12		42	44	32	36	30	16	18	15	16	14		0	10	3	0	1	4	0	0	0	2	25	38	18	17	3
30	Control group	23	33	11	27	29	9	17	12	16	12		42	44	32	35	29	15	17	15	16	14		42	44	32	35	30	16	17	15	16	14		19	11	21	8	0	6	0	3	0	2	19	11	21	8	1
31	Control group	15	25	18	29	25	9	13	7	13	9		28	28	24	29	25	11	16	11	13	10		31	30	24	29	27	12	16	11	13	10		13	3	6	0	0	2	3	4	0	1	16	5	6	0	2
32	Control group	26	23	21	26	24	10	12	10	11	9		26	25	21	26	26	10	14	10	13	10		33	33	24	30	27	13	16	12	13	10		0	2	0	0	2	0	2	0	2	1	7	10	3	4	3
33	Control group	22	16	14	24	22	10	13	9	11	8		22	21	16	24	23	10	14	9	11	8		22	21	16	24	23	10	14	9	11	8		0	5	2	0	1	0	1	0	0	0	0	5	2	0	1
34	Control group	13	11	10	19	18	6	12	6	8	4		13	11	10	19	18	6	12	6	8	4		13	11	10	19	18	6	12	6	8	4		0	0	0	0	0	0	0	0	0	0	0	0	0	0	0
35	Control group	26	26	20	24	20	7	14	9	12	9		27	26	20	27	22	11	15	9	12	9		27	26	20	27	24	11	15	9	12	9		1	0	0	3	2	4	1	0	0	0	1	0	0	3	4
36	Control group	20	19	14	15	20	10	14	9	11	7		20	19	19	21	20	10	14	9	13	10		31	30	24	29	23	12	16	11	13	10		0	0	5	6	0	0	0	0	2	3	11	11	10	14	3
37	Control group	37	29	27	33	21	15	14	8	13	10		40	41	30	34	21	15	17	14	15	13		40	41	30	34	22	15	17	14	15	13		3	12	3	1	0	0	3	6	2	3	3	12	3	1	1
38	Control group	23	16	22	20	23	7	17	12	15	10		40	41	30	34	23	15	17	14	15	13		40	41	30	34	24	15	17	14	15	13		17	25	8	14	0	8	0	2	0	3	17	25	8	14	1
39	Control group	12	12	14	15	19	8	12	6	9	7		12	12	14	15	20	8	12	6	9	7		27	26	20	26	25	11	15	9	12	9		0	0	0	0	1	0	0	0	0	0	15	14	6	11	6
40	Control group	17	6	13	26	19	8	12	9	12	9		27	27	20	27	20	11	15	9	12	9		27	27	20	27	23	11	15	9	12	9		10	21	7	1	1	3	3	0	0	0	10	21	7	1	4
41	Control group	19	19	4	22	20	8	13	8	10	7		20	19	16	24	23	9	14	8	10	7		20	19	16	24	23	9	14	8	10	7		1	0	12	2	3	1	1	0	0	0	1	0	12	2	3
42	Control group	17	6	14	22	18	8	13	7	9	6		17	16	14	22	21	8	13	7	9	6		17	16	14	22	21	8	13	7	9	6		0	10	0	0	3	0	0	0	0	0	0	10	0	0	3
43	Control group	15	13	6	20	20	7	13	6	8	5		15	13	11	20	20	7	13	6	8	5		15	13	11	20	21	7	13	6	8	5		0	0	5	0	0	0	0	0	0	0	0	0	5	0	1
44	Control group	21	21	17	21	20	10	14	8	15	12		21	21	19	21	22	10	14	10	17	12		47	44	34	38	23	17	18	16	17	15		0	0	2	0	2	0	0	2	2	0	26	23	17	17	3
45	Control group	16	20	19	23	23	11	14	9	11	9		25	25	19	26	24	11	15	9	12	9		25	25	19	26	24	11	15	9	12	9		9	5	0	3	1	0	1	0	1	0	9	5	0	3	1
46	Observation group	25	21	16	22	27	10	15	8	18	14		28	30	25	26	30	12	15	11	18	15		49	48	36	39	31	17	20	18	18	15		3	9	9	4	3	2	0	3	0	1	24	26	20	17	3
47	Observation group	16	20	15	18	18	5	13	9	12	8		16	21	16	18	19	9	13	9	12	8		37	40	29	33	27	14	18	14	14	12		0	1	1	0	1	4	0	0	0	0	21	20	14	15	9
48	Observation group	31	45	25	25	25	11	13	10	10	7		41	47	33	36	30	13	19	16	16	14		45	47	33	36	30	16	19	16	16	14		10	2	8	11	5	2	6	6	6	7	14	2	8	11	5
49	Observation group	12	12	6	15	27	6	12	7	8	6		12	12	13	16	28	6	12	7	8	6		50	47	36	39	30	17	19	19	19	15		0	0	7	1	1	0	0	0	0	0	38	35	30	24	3
50	Observation group	27	26	20	20	27	10	15	12	17	14		30	34	30	29	30	14	16	13	18	15		49	47	36	39	30	17	19	19	18	15		3	8	10	9	3	4	1	1	1	1	22	21	16	19	3
51	Observation group	21	13	10	22	20	9	13	10	11	8		21	24	20	22	20	10	13	10	11	8		25	30	20	25	20	10	15	11	11	8		0	11	10	0	0	1	0	0	0	0	4	17	10	3	0
52	Observation group	29	34	26	26	27	1	18	9	14	14		39	47	33	33	30	15	18	16	15	14		41	47	33	36	30	15	19	16	15	14		10	13	7	7	3	14	0	7	1	0	12	13	7	10	3
53	Observation group	17	15	11	20	23	10	12	7	12	9		26	33	25	26	25	10	15	11	14	11		32	40	28	34	25	13	17	13	14	11		9	18	14	6	2	0	3	4	2	2	15	25	17	14	2
54	Observation group	13	9	7	16	20	5	12	9	12	8		17	21	17	20	20	9	13	9	12	8		32	34	26	30	25	13	17	13	14	11		4	12	10	4	0	4	1	0	0	0	19	25	19	14	5
55	Observation group	33	38	20	28	25	10	14	11	12	12		33	40	24	30	27	12	16	13	14	12		37	40	29	33	27	14	18	14	14	12		0	2	4	2	2	2	2	2	2	0	4	2	9	5	2
56	Observation group	31	29	22	31	20	11	14	12	14	11		35	35	26	31	26	14	17	13	14	11		35	40	28	34	26	14	17	13	14	11		4	6	4	0	6	3	3	1	0	0	4	11	6	3	6
57	Observation group	15	35	27	26	27	8	16	13	13	11		35	38	33	30	30	16	16	15	17	15		46	47	36	39	30	17	19	17	17	15		20	3	6	4	3	8	0	2	4	4	31	12	9	13	3
58	Observation group	15	29	22	26	29	9	18	11	13	8		38	40	30	33	29	15	18	15	15	13		40	44	32	35	29	15	18	15	15	13		23	11	8	7	0	6	0	4	2	5	25	15	10	9	0
59	Observation group	25	8	19	24	26	12	15	7	14	11		25	31	24	25	26	12	15	11	14	11		34	37	28	31	26	14	17	13	14	11		0	23	5	1	0	0	0	4	0	0	9	29	9	7	0
60	Observation group	16	19	14	28	26	10	11	9	14	9		28	34	27	28	27	14	15	11	14	12		37	41	30	33	27	14	18	14	14	12		12	15	13	0	1	4	4	2	0	3	21	22	16	5	1
61	Observation group	24	15	11	20	25	5	14	9	14	11		24	31	24	25	25	10	15	11	14	11		36	40	29	32	27	14	17	14	14	11		0	16	13	5	0	5	1	2	0	0	12	25	18	12	2
62	Observation group	25	32	25	22	28	10	12	8	11	12		28	35	27	28	30	11	15	11	17	15		46	47	36	39	30	17	19	18	17	15		3	3	2	6	2	1	3	3	6	3	21	15	11	17	2
63	Observation group	21	17	13	20	23	10	10	6	13	11		22	28	23	24	24	9	15	10	13	11		32	35	25	29	24	13	17	13	13	11		1	11	10	4	1	-1	5	4	0	0	11	18	12	9	1
64	Observation group	11	10	11	14	16	6	12	6	8	2		11	10	11	14	16	6	12	6	8	4		36	39	29	32	27	14	17	14	14	11		0	0	0	0	0	0	0	0	0	2	25	29	18	18	11
65	Observation group	19	21	16	25	21	8	15	11	12	8		26	25	21	25	21	11	15	11	12	8		26	30	21	27	21	11	15	11	12	8		7	4	5	0	0	3	0	0	0	0	7	9	5	2	0
66	Observation group	12	4	10	17	13	6	13	6	7	3		12	10	10	17	13	6	13	6	7	3		13	14	17	18	13	6	13	6	8	3		0	6	0	0	0	0	0	0	0	0	1	10	7	1	0
67	Observation group	12	12	13	15	16	6	12	7	8	6		12	12	13	16	16	6	12	7	8	6		39	43	31	34	28	15	18	15	15	13		0	0	0	1	0	0	0	0	0	0	27	31	18	19	12
68	Observation group	20	11	8	31	24	12	18	10	14	13		40	46	33	35	29	13	18	16	15	13		41	46	33	35	29	15	18	16	15	13		20	35	25	4	5	1	0	6	1	0	21	35	25	4	5
69	Observation group	21	19	14	22	18	7	13	6	12	9		21	26	20	22	21	10	13	10	12	9		27	26	22	26	21	11	16	12	12	9		0	7	6	0	3	3	0	4	0	0	6	7	8	4	3
70	Observation group	26	6	4	29	30	14	12	9	17	14		35	47	33	30	30	15	16	15	19	15		50	47	36	39	30	17	19	19	19	15		9	41	29	1	0	1	4	6	2	1	24	41	32	10	0
71	Observation group	22	17	17	20	18	9	10	9	10	6		22	17	17	23	18	9	14	9	10	6		22	24	21	23	18	9	14	9	10	6		0	0	0	3	0	0	4	0	0	0	0	7	4	3	0
72	Observation group	34	9	7	31	23	14	13	12	14	11		34	35	24	31	26	14	16	13	14	11		34	35	27	31	26	14	17	13	14	11		0	26	17	0	3	0	3	1	0	0	0	26	20	0	3
73	Observation group	28	14	11	25	24	8	13	6	14	11		32	33	25	29	25	13	17	13	14	11		32	37	25	29	25	13	17	13	14	11		4	19	14	4	1	5	4	7	0	0	4	23	14	4	1
74	Observation group	16	21	17	15	23	9	13	6	12	4		16	21	17	18	24	9	13	9	12	8		46	47	36	39	30	17	19	18	17	15		0	0	0	3	1	0	0	3	0	4	30	26	19	24	7
75	Observation group	39	18	14	32	26	11	15	16	17	14		39	47	36	33	30	17	18	16	17	15		46	47	36	39	30	17	19	17	17	15		0	29	22	1	4	6	3	0	0	1	7	29	22	7	4
76	Observation group	20	29	23	22	23	7	14	6	14	11		24	31	23	25	25	10	15	11	14	11		35	38	28	31	26	14	17	13	14	11		4	2	0	3	2	3	1	5	0	0	15	9	5	9	3
77	Observation group	17	12	9	15	22	10	11	9	14	11		22	27	20	22	24	10	13	10	14	12		37	40	29	33	27	14	18	14	14	12		5	15	11	7	2	0	2	1	0	1	20	28	20	18	5
78	Observation group	25	25	16	15	20	10	13	8	11	8		25	25	21	25	20	11	15	11	12	8		26	25	23	25	20	11	15	11	12	8		0	0	5	10	0	1	2	3	1	0	1	0	7	10	0
79	Observation group	17	11	12	15	16	7	10	8	9	5		17	11	14	20	16	7	14	8	9	5		25	16	16	20	17	7	14	8	9	5		0	0	2	5	0	0	4	0	0	0	8	5	4	5	1
80	Observation group	22	13	10	24	22	12	13	9	13	10		31	31	24	28	24	12	16	13	13	10		33	37	24	29	24	12	16	13	13	10		9	18	14	4	2	0	3	4	0	0	11	24	14	5	2
81	Observation group	17	15	16	20	19	9	10	9	12	8		17	22	17	20	20	9	13	9	12	8		35	38	28	31	26	14	17	13	14	11		0	7	1	0	1	0	3	0	0	0	18	23	12	11	7
82	Observation group	24	24	18	35	28	11	12	10	15	9		44	47	30	38	30	16	19	17	16	14		45	47	34	38	30	16	19	17	16	14		20	23	12	3	2	5	7	7	1	5	21	23	16	3	2
83	Observation group	17	33	26	16	19	6	15	10	12	9		40	47	33	36	30	16	18	16	16	14		43	47	34	37	30	16	19	17	16	14		23	14	7	20	11	10	3	6	4	5	26	14	8	21	11
84	Observation group	13	14	13	15	18	7	12	6	10	6		13	14	13	16	18	7	12	7	10	6		31	30	24	28	24	12	16	13	13	10		0	0	0	1	0	0	0	1	0	0	18	16	11	13	6
85	Observation group	24	25	23	22	22	10	15	6	13	3		32	31	25	29	24	13	16	13	13	10		34	35	25	30	24	13	16	13	13	10		8	6	2	7	2	3	1	7	0	7	10	10	2	8	2
86	Observation group	21	22	20	24	20	8	11	11	10	8		25	22	20	24	20	10	15	11	11	8		27	25	20	26	20	10	15	11	11	8		4	0	0	0	0	2	4	0	1	0	6	3	0	2	0
87	Observation group	22	18	17	20	16	9	14	8	8	4		22	18	17	23	18	9	14	9	10	6		28	24	19	28	18	9	14	9	10	6		0	0	0	3	2	0	0	1	2	2	6	6	2	8	2
88	Observation group	20	15	16	22	17	8	14	6	10	5		20	15	16	22	17	8	14	9	10	5		24	24	17	27	17	8	14	9	10	5		0	0	0	0	0	0	0	3	0	0	4	9	1	5	0
89	Observation group	20	15	12	20	20	6	12	9	12	12		20	23	19	20	20	9	13	9	12	15		49	47	36	39	30	17	19	19	18	15		0	8	7	0	0	3	1	0	0	3	29	32	24	19	10
90	Observation group	22	22	17	25	23	6	16	9	13	10		30	29	23	27	23	12	16	12	13	10		32	30	23	27	23	12	16	12	13	10		8	7	6	2	0	6	0	3	0	0	10	8	6	2	0
91	Observation group	45	26	23	32	22	9	16	14	12	12		46	29	27	34	25	11	17	15	13	15		48	38	28	36	26	13	18	18	15	16		1	3	4	2	3	2	1	1	1	3	3	12	5	4	4
92	Observation group	28	25	23	31	24	11	14	10	11	8		30	30	26	32	26	13	15	11	12	11		38	35	31	34	28	15	17	14	12	13		2	5	3	1	2	2	1	1	1	3	10	10	8	3	4
93	Observation group	25	22	22	24	26	12	13	8	10	6		27	32	25	25	28	14	15	10	12	7		34	39	27	28	30	16	15	13	14	9		2	10	3	1	2	2	2	2	2	1	9	17	5	4	4
[truncated: 15 more columns]
