# Supplementary material for: The clinical effects of Orff music therapy on children with autism spectrum disorder: a comprehensive evaluation
Source: Front Neurol. 2024 Jun 6;15:1387060. doi: 10.3389/fneur.2024.1387060 (PMC11188925; doi:10.3389/fneur.2024.1387060)
Supplement: Supplementary file 6 [file Data_Sheet_4.XLSX]

## Sheet: Sheet1
ID	Group	Gender	Antenatal infection	Perinatal asphyxia	Epilepsy	Education of mother	Education of father	Family's monthly income	Baseline age (months)	Paternal age (years)	Maternal age (years)	Gestational age (weeks)	Birth weight (kg)
1	Control group	Male	No	No	No	University	Senior high school	＞10000	53.45	36.72	27.12	36.24	3.07
2	Control group	Male	No	No	No	University	University	＞10000	68.34	42.33	28.34	41.12	3.14
3	Control group	Female	No	No	No	University	Junior high school	5000～10000	49.56	22.46	25.87	36.35	4.01
4	Control group	Female	No	No	No	University	University	5000～10000	55.12	33.87	22.21	40.12	3.49
5	Control group	Male	No	No	No	Junior high school	University	＜5000	56.78	33.24	24.76	38.35	3.87
6	Control group	Female	No	No	Yes	Senior high school	Senior high school	5000～10000	40.23	22.57	32.12	40.14	3.22
7	Control group	Male	Yes	No	No	University	University	＜5000	62.78	33.78	22.76	36.45	2.58
8	Control group	Male	No	No	No	Senior high school	University	＜5000	60.46	28.45	31.24	37.45	2.14
9	Control group	Female	No	Yes	No	University	University	5000～10000	39.76	41.67	26.24	40.15	4.12
10	Control group	Male	No	No	No	University	University	＞10000	71.28	23.43	21.87	35.78	3.57
11	Control group	Male	Yes	No	No	Junior high school	Senior high school	5000～10000	48.76	35.67	29.34	41.24	3.12
12	Control group	Male	No	No	No	University	Senior high school	＜5000	49.72	33.21	26.34	37.34	3.43
13	Control group	Female	Yes	Yes	No	Senior high school	University	5000～10000	53.24	27.85	25.73	38.67	3.09
14	Control group	Male	No	No	No	University	Junior high school	＜5000	50.72	39.34	30.24	41.35	3.52
15	Control group	Female	No	No	Yes	University	Senior high school	5000～10000	56.76	30.12	25.43	40.24	3.28
16	Control group	Male	No	No	No	University	Junior high school	＜5000	61.22	39.87	32.56	39.76	3.67
17	Control group	Male	No	No	No	Senior high school	University	5000～10000	58.55	42.12	30.87	37.82	4.08
18	Control group	Female	No	No	No	University	University	5000～10000	43.56	32.67	36.12	40.89	3.87
19	Control group	Female	Yes	No	No	University	Senior high school	＜5000	61.22	33.76	30.76	39.54	3.45
20	Control group	Female	No	No	No	University	Junior high school	＜5000	50.44	32.12	29.11	38.76	3.47
21	Control group	Male	Yes	No	No	University	University	5000～10000	55.76	32.76	31.32	37.65	4.02
22	Control group	Male	No	No	No	Junior high school	University	＜5000	66.34	35.45	24.67	38.43	4.2
23	Control group	Male	No	No	No	University	University	5000～10000	55.87	24.38	20.35	40.21	4.12
24	Control group	Male	No	No	No	University	Junior high school	5000～10000	46.57	36.78	20.56	39.13	3.67
25	Control group	Male	Yes	No	No	Junior high school	Junior high school	＞10000	44.87	39.67	37.14	40.12	3.23
26	Control group	Female	No	No	No	University	University	5000～10000	72.24	34.56	21.55	40.23	3.59
27	Control group	Male	No	No	No	University	Senior high school	5000～10000	38.45	37.56	34.26	35.78	2.34
28	Control group	Female	No	No	No	Junior high school	Junior high school	5000～10000	38.67	22.34	31.88	38.24	3.43
29	Control group	Male	No	Yes	No	University	University	＞10000	72.87	39.76	31.78	38.79	3.56
30	Control group	Male	No	No	No	University	University	＜5000	65.76	28.45	34.34	40.23	2.78
31	Control group	Male	No	No	No	University	Senior high school	＞10000	39.54	30.23	27.19	41.56	4.09
32	Control group	Male	Yes	No	No	University	Junior high school	＞10000	61.22	23.57	30.67	40.34	3.23
33	Control group	Male	No	No	No	University	University	＞10000	37.56	34.46	38.56	36.78	4.04
34	Control group	Male	No	No	No	Junior high school	Junior high school	5000～10000	72.86	41.87	25.77	39.24	3.78
35	Control group	Male	No	No	No	Senior high school	Senior high school	5000～10000	67.33	37.45	22.56	34.68	4
36	Control group	Female	No	No	No	University	University	＞10000	63.55	42.34	33.26	39.24	4.11
37	Control group	Female	No	No	No	Senior high school	University	＞10000	37.27	27.89	33.87	40.34	4.03
38	Control group	Male	No	No	No	University	University	5000～10000	41.67	26.13	26.34	39.24	3.21
39	Control group	Male	No	No	No	Senior high school	University	5000～10000	44.87	41.64	36.65	40.87	4.13
40	Control group	Male	No	No	No	University	University	＞10000	64.78	22.78	25.49	39.56	4.03
41	Control group	Female	No	No	No	Junior high school	University	5000～10000	48.69	42.12	37.45	36.76	3.24
42	Control group	Male	No	No	No	University	Senior high school	＞10000	54.76	24.56	34.87	34.65	3.92
43	Control group	Male	No	Yes	No	University	Junior high school	＞10000	57.46	32.18	38.12	38.54	3.73
44	Control group	Male	No	No	No	University	University	＞10000	41.45	30.55	27.83	40.81	4.13
45	Control group	Female	No	No	Yes	Junior high school	University	＞10000	57.34	41.76	37.22	41.54	4.07
46	Observation group	Male	No	No	No	University	Junior high school	＜5000	70.45	25.49	25.45	40.23	4.12
47	Observation group	Male	Yes	No	No	Senior high school	University	＞10000	40.56	28.46	27.93	39.32	3.12
48	Observation group	Male	No	No	Yes	Senior high school	University	＜5000	54.76	40.76	24.66	41.76	3.65
49	Observation group	Female	No	No	No	University	University	＞10000	58.56	35.67	23.78	34.76	3.21
50	Observation group	Male	No	No	No	Senior high school	University	5000～10000	58.76	40.33	36.78	41.27	3.45
51	Observation group	Male	No	No	No	University	Junior high school	5000～10000	61.34	40.57	31.98	39.54	4.05
52	Observation group	Female	No	No	Yes	University	Junior high school	5000～10000	43.78	42.88	26.24	40.38	4.13
53	Observation group	Male	No	No	No	Junior high school	University	＞10000	52.44	27.56	31.47	41.46	3.12
54	Observation group	Female	No	No	No	Senior high school	Senior high school	＞10000	59.87	31.24	33.87	35.87	3.45
55	Observation group	Female	No	No	No	University	University	＜5000	69.25	25.86	37.43	37.25	4.21
56	Observation group	Male	No	No	No	University	Junior high school	＜5000	64.87	33.76	38.12	41.56	2.34
57	Observation group	Male	No	No	No	University	Junior high school	5000～10000	68.56	34.76	29.29	34.78	4.03
58	Observation group	Male	Yes	No	No	University	University	5000～10000	38.56	36.26	30.65	36.39	2.14
59	Observation group	Male	No	No	Yes	University	Senior high school	5000～10000	63.76	38.35	29.12	41.24	4.3
60	Observation group	Male	No	No	No	University	University	＞10000	43.56	26.88	25.78	38.44	3.21
61	Observation group	Male	Yes	No	No	Senior high school	University	5000～10000	38.65	34.58	30.12	40.26	4.01
62	Observation group	Male	No	No	No	Junior high school	University	5000～10000	63.57	35.87	38.66	39.46	2.43
63	Observation group	Male	No	No	No	Junior high school	University	＞10000	66.56	23.15	29.23	40.34	3.24
64	Observation group	Male	No	No	No	University	University	＜5000	60.34	35.67	31.76	40.36	2.78
65	Observation group	Female	No	No	Yes	Junior high school	University	5000～10000	38.46	25.87	29.44	39.67	4.04
66	Observation group	Male	No	No	No	University	University	5000～10000	39.56	30.15	20.67	41.48	4.21
67	Observation group	Male	No	No	No	University	University	＞10000	51.45	30.87	37.86	41.56	3.21
68	Observation group	Male	Yes	No	No	University	Senior high school	＞10000	42.88	27.58	33.17	38.78	3.46
69	Observation group	Male	No	No	No	University	University	＞10000	60.34	30.87	38.79	41.45	3.46
70	Observation group	Male	No	No	No	University	Junior high school	＞10000	40.76	38.28	22.46	35.67	4.07
71	Observation group	Female	No	Yes	No	University	University	＞10000	71.34	34.56	36.72	38.76	4.17
72	Observation group	Female	No	No	No	University	Senior high school	5000～10000	72.66	32.76	22.84	40.23	4.08
73	Observation group	Male	No	No	No	University	University	＞10000	38.77	40.23	37.25	40.12	3.24
74	Observation group	Female	Yes	No	Yes	University	University	＜5000	39.65	33.78	33.27	37.86	3.12
75	Observation group	Male	No	Yes	No	Senior high school	Senior high school	＞10000	54.88	35.76	34.56	38.65	2.43
76	Observation group	Male	No	No	No	Senior high school	Senior high school	5000～10000	51.55	28.34	24.74	38.73	4.13
77	Observation group	Female	No	No	No	University	Junior high school	5000～10000	67.89	38.45	21.34	39.25	4.02
78	Observation group	Male	Yes	No	No	University	Junior high school	5000～10000	47.55	35.45	28.45	37.85	3.95
79	Observation group	Male	No	No	No	Junior high school	Senior high school	5000～10000	55.76	23.98	31.24	39.25	3.67
80	Observation group	Male	No	No	No	University	University	5000～10000	63.24	41.29	30.67	36.33	3.21
81	Observation group	Male	No	No	No	University	Senior high school	5000～10000	64.76	40.42	32.77	38.74	4.12
82	Observation group	Male	No	No	No	University	University	5000～10000	63.88	40.78	33.56	37.54	4
83	Observation group	Male	No	No	No	University	University	＞10000	71.44	28.33	33.17	34.87	3.23
84	Observation group	Male	No	Yes	No	Junior high school	University	5000～10000	46.57	28.95	30.27	37.17	3.24
85	Observation group	Male	No	No	No	University	Junior high school	5000～10000	38.56	37.47	35.67	37.45	4.01
86	Observation group	Female	No	No	No	University	University	＜5000	71.73	40.87	29.76	40.34	3.33
87	Observation group	Male	No	No	No	University	University	＞10000	52.66	33.29	26.78	40.57	4.12
88	Observation group	Male	No	No	No	Senior high school	Senior high school	＞10000	43.77	34.89	20.24	39.24	3.78
89	Observation group	Female	No	No	No	University	University	5000～10000	43.12	42.77	30.25	34.56	3.27
90	Observation group	Male	No	No	No	University	Senior high school	5000～10000	54.78	29.44	32.78	38.58	3.58
91	Observation group	Female	No	No	No	University	University	5000～10000	46.74	30.44	28.77	36.31	2.62
92	Observation group	Male	No	No	No	Senior high school	University	＜5000	55.98	24.82	20.76	35.76	3.65
93	Observation group	Female	No	No	No	Senior high school	Senior high school	5000～10000	62.56	34.67	27.34	39.48	4.05
